# Supplementary material for: The design of a series of cocrystals featuring dicarboxylic acid with a modified isoniazid derivative
Source: Royal Society of Chemistry journal article supplement (doi:10.1039/d3ce00846k), 2023-12-06
Supplement: d3ce00846k1.pdf [file d3ce00846k1.pdf]

## Supplementary

### S1 Crystal Structures Experimental Conditions

**Table S1** Experimental details

|                                                              | (izact+C6)                                                                                        | (izact+C7)                                                                                          | (izact+C8)                                                                                        | (izact+C9)                                                                                        | (izact+C10)                                                                                          |
|--------------------------------------------------------------|---------------------------------------------------------------------------------------------------|-----------------------------------------------------------------------------------------------------|---------------------------------------------------------------------------------------------------|---------------------------------------------------------------------------------------------------|------------------------------------------------------------------------------------------------------|
| Chemical formula                                             | (C <sub>9</sub> H <sub>11</sub> N <sub>3</sub> O)·(C <sub>3</sub> H <sub>5</sub> O <sub>2</sub> ) | 2(C <sub>9</sub> H <sub>11</sub> N <sub>3</sub> O)·(C <sub>7</sub> H <sub>12</sub> O <sub>4</sub> ) | (C <sub>9</sub> H <sub>11</sub> N <sub>3</sub> O)·(C <sub>4</sub> H <sub>7</sub> O <sub>2</sub> ) | (C <sub>9</sub> H <sub>11</sub> N <sub>3</sub> O)·(C <sub>4</sub> H <sub>8</sub> O <sub>2</sub> ) | 2(C <sub>9</sub> H <sub>11</sub> N <sub>3</sub> O)·(C <sub>10</sub> H <sub>18</sub> O <sub>4</sub> ) |
| <i>M<sub>r</sub></i>                                         | 250.28                                                                                            | 514.58                                                                                              | 264.3                                                                                             | 271.32                                                                                            | 556.66                                                                                               |
| Crystal system, space group                                  | Monoclinic, <i>P2<sub>1</sub>/c</i>                                                               | Monoclinic, <i>C2/c</i>                                                                             | Monoclinic, <i>P2<sub>1</sub>/c</i>                                                               | Monoclinic, <i>C2/c</i>                                                                           | Triclinic, <i>P1</i>                                                                                 |
| Temperature (K)                                              | 173                                                                                               | 173                                                                                                 | 173                                                                                               | 173                                                                                               | 173                                                                                                  |
| <i>a</i> , <i>b</i> , <i>c</i> (Å)                           | 19.0668 (10),<br>8.1886 (4),<br>8.0487 (4)                                                        | 47.130 (4), 5.0755 (4), 23.567 (2)                                                                  | 19.888 (4),<br>8.2744 (15),<br>8.3942 (15)                                                        | 22.0145 (19),<br>16.7461 (15),<br>7.9045 (6)                                                      | 7.9554 (4),<br>13.7715 (8),<br>14.6005 (8)                                                           |
| $\alpha$ , $\beta$ , $\gamma$ (°)                            | 90, 91.561 (3),<br>90                                                                             | 90, 111.352 (2),<br>90                                                                              | 90, 96.316 (6),<br>90                                                                             | 90, 100.476 (3),<br>90                                                                            | 72.874 (3), 75.014 (3), 84.453 (3)                                                                   |
| <i>V</i> (Å <sup>3</sup> )                                   | 1256.18 (11)                                                                                      | 5250.6 (8)                                                                                          | 1373.0 (4)                                                                                        | 2865.5 (4)                                                                                        | 1476.32 (14)                                                                                         |
| <i>Z</i>                                                     | 4                                                                                                 | 8                                                                                                   | 4                                                                                                 | 8                                                                                                 | 2                                                                                                    |
| Radiation type                                               | Mo <i>K</i> $\alpha$                                                                              | Mo <i>K</i> $\alpha$                                                                                | Mo <i>K</i> $\alpha$                                                                              | Mo <i>K</i> $\alpha$                                                                              | Mo <i>K</i> $\alpha$                                                                                 |
| $\mu$ (mm <sup>-1</sup> )                                    | 0.10                                                                                              | 0.10                                                                                                | 0.09                                                                                              | 0.09                                                                                              | 0.09                                                                                                 |
| Crystal size (mm)                                            | 0.55 × 0.20 × 0.15                                                                                | 0.46 × 0.24 × 0.08                                                                                  | 0.34 × 0.15 × 0.08                                                                                | 0.38 × 0.20 × 0.05                                                                                | 0.36 × 0.22 × 0.14                                                                                   |
| F(000)                                                       | 532                                                                                               | 2192                                                                                                | 564                                                                                               | 1160                                                                                              | 596                                                                                                  |
| 2 $\theta$ range for data collection (°)                     | 2.137 - 27.997                                                                                    | 2.726 - 28.000                                                                                      | 2.060 - 28.345                                                                                    | 2.887 - 28.279                                                                                    | 1.504 - 28.317                                                                                       |
| Reflections collected                                        | 11423                                                                                             | 50090                                                                                               | 27737                                                                                             | 54106                                                                                             | 54935                                                                                                |
| Independent reflns                                           | 3034 [ <i>R</i> <sub>int</sub> = 0.0321]                                                          | 6309 [ <i>R</i> <sub>int</sub> = 0.0389]                                                            | 3282 [ <i>R</i> <sub>int</sub> = 0.1042]                                                          | 3570 [ <i>R</i> <sub>int</sub> = 0.1327]                                                          | 7371 [ <i>R</i> <sub>int</sub> = 0.0882]                                                             |
| Goodness-of-fit on <i>F</i> <sup>2</sup>                     | 1.044                                                                                             | 1.182                                                                                               | 1.032                                                                                             | 1.031                                                                                             | 1.027                                                                                                |
| final <i>R</i> indexes [ <i>I</i> ≥ 2 $\sigma$ ( <i>I</i> )] | <i>R</i> <sub>1</sub> = 0.0465,<br><i>wR</i> <sub>2</sub> = 0.1097                                | <i>R</i> <sub>1</sub> = 0.0829, <i>wR</i> <sub>2</sub> = 0.1916                                     | <i>R</i> <sub>1</sub> = 0.0664,<br><i>wR</i> <sub>2</sub> = 0.1659                                | <i>R</i> <sub>1</sub> = 0.0506,<br><i>wR</i> <sub>2</sub> = 0.1077                                | <i>R</i> <sub>1</sub> = 0.0528, <i>wR</i> <sub>2</sub> = 0.1317                                      |
| final <i>R</i> indexes [all data]                            | <i>R</i> <sub>1</sub> = 0.0701,<br><i>wR</i> <sub>2</sub> = 0.1225                                | <i>R</i> <sub>1</sub> = 0.1011, <i>wR</i> <sub>2</sub> = 0.1988                                     | <i>R</i> <sub>1</sub> = 0.1118,<br><i>wR</i> <sub>2</sub> = 0.1913                                | <i>R</i> <sub>1</sub> = 0.1070,<br><i>wR</i> <sub>2</sub> = 0.1354                                | <i>R</i> <sub>1</sub> = 0.0783, <i>wR</i> <sub>2</sub> = 0.1490                                      |

## S2 Hydrogen Bond Tables

**Table S2** Hydrogen-bond geometry (Å, °) for (izact+C6)

| <i>D</i> —H $\cdots$ <i>A</i>  | <i>D</i> —H | H $\cdots$ <i>A</i> | <i>D</i> $\cdots$ <i>A</i> | <i>D</i> —H $\cdots$ <i>A</i> |
|--------------------------------|-------------|---------------------|----------------------------|-------------------------------|
| N1—H1 $\cdots$ N3 <sup>i</sup> | 0.88 (2)    | 2.56 (2)            | 3.1789 (19)                | 128.7 (17)                    |
| N1—H1 $\cdots$ O1 <sup>i</sup> | 0.88 (2)    | 2.65 (2)            | 3.515 (2)                  | 169.3 (18)                    |
| O2—H2 <i>A</i> $\cdots$ N2     | 0.89 (2)    | 1.82 (2)            | 2.7069 (17)                | 175 (2)                       |

Symmetry codes: (i) *x*,  $-y+1/2$ ,  $z+1/2$ .

**Table S3** Hydrogen-bond geometry (Å, °) for (izact+C7)

| <i>D</i> —H $\cdots$ <i>A</i>                              | <i>D</i> —H | H $\cdots$ <i>A</i> | <i>D</i> $\cdots$ <i>A</i> | <i>D</i> —H $\cdots$ <i>A</i> |
|------------------------------------------------------------|-------------|---------------------|----------------------------|-------------------------------|
| N1 <i>B</i> —H1 <i>B</i> $\cdots$ O1 <i>B</i> <sup>i</sup> | 0.88        | 2.18                | 3.030 (4)                  | 162                           |
| N1 <i>A</i> —H1 <i>A</i> $\cdots$ O1 <i>A</i> <sup>i</sup> | 0.88        | 2.16                | 3.016 (4)                  | 163                           |
| O2—H2 $\cdots$ N2 <i>A</i>                                 | 0.84        | 1.79                | 2.620 (4)                  | 170                           |
| O4—H4 $\cdots$ N2 <i>B</i>                                 | 0.84        | 1.82                | 2.635 (4)                  | 164                           |

Symmetry code: (i) *x*,  $y-1$ , *z*.

**Table S4** Hydrogen-bond geometry (Å, °) for (izact+C8)

| <i>D</i> —H $\cdots$ <i>A</i> | <i>D</i> —H | H $\cdots$ <i>A</i> | <i>D</i> $\cdots$ <i>A</i> | <i>D</i> —H $\cdots$ <i>A</i> |
|-------------------------------|-------------|---------------------|----------------------------|-------------------------------|
| O2—H2 <i>B</i> $\cdots$ N1    | 0.84        | 1.87                | 2.686 (3)                  | 163                           |

**Table S5** Hydrogen-bond geometry (Å, °) for (izact+C9)

| <i>D</i> —H $\cdots$ <i>A</i>           | <i>D</i> —H | H $\cdots$ <i>A</i> | <i>D</i> $\cdots$ <i>A</i> | <i>D</i> —H $\cdots$ <i>A</i> |
|-----------------------------------------|-------------|---------------------|----------------------------|-------------------------------|
| N2—H2 <i>A</i> $\cdots$ N3 <sup>i</sup> | 0.89 (3)    | 2.30 (3)            | 3.054 (2)                  | 142 (2)                       |
| N2—H2 <i>A</i> $\cdots$ O1 <sup>i</sup> | 0.89 (3)    | 2.60 (3)            | 3.403 (2)                  | 150 (2)                       |
| O2—H2 <i>B</i> $\cdots$ N1              | 0.99 (3)    | 1.71 (3)            | 2.690 (2)                  | 174 (3)                       |

Symmetry codes: (i) *x*,  $-y+1$ ,  $z+1/2$ .

**Table S6** Hydrogen-bond geometry (Å, °) for (izact+C10)

| $D-H\cdots A$          | $D-H$    | $H\cdots A$ | $D\cdots A$ | $D-H\cdots A$ |
|------------------------|----------|-------------|-------------|---------------|
| $N2-H2B\cdots N6^i$    | 0.88 (2) | 2.35 (2)    | 3.088 (2)   | 141.8 (18)    |
| $N2-H2B\cdots O6^i$    | 0.88 (2) | 2.60 (2)    | 3.384 (2)   | 149.2 (17)    |
| $O2-H2\cdots N1$       | 0.96 (3) | 1.80 (3)    | 2.706 (2)   | 156 (3)       |
| $O4-H4\cdots N4$       | 0.94 (3) | 1.74 (3)    | 2.6770 (18) | 176 (3)       |
| $N5-H5A\cdots N3^{ii}$ | 0.84 (2) | 2.31 (2)    | 3.0476 (19) | 147.4 (19)    |

Symmetry codes: (i)  $-x+1, -y+1, -z+1$ ; (ii)  $-x+2, -y+1, -z+1$ .

## S2 PXRD Patterns

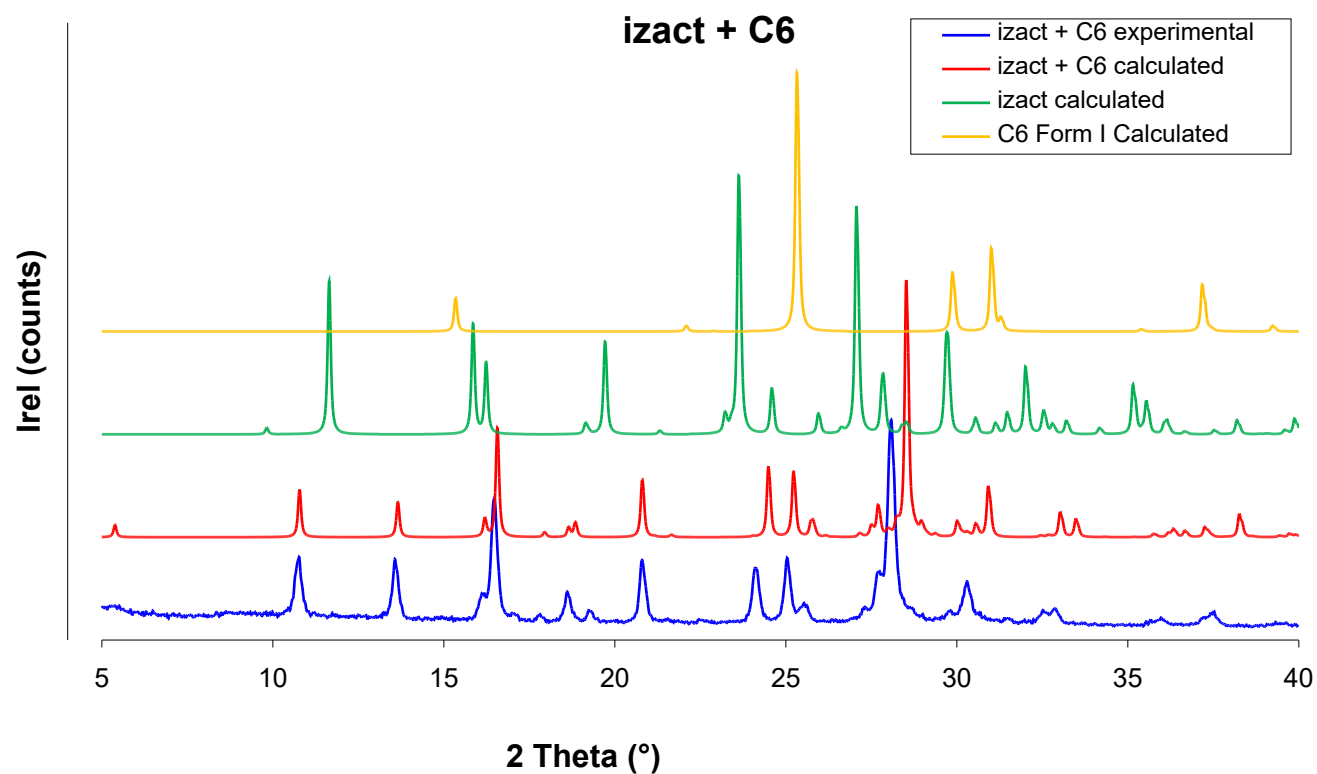

**Figure S1** Powder patterns for the experimental and calculated patterns of the cocrystal of izact + C6, together with the calculated patterns of its coformers in their pure form.

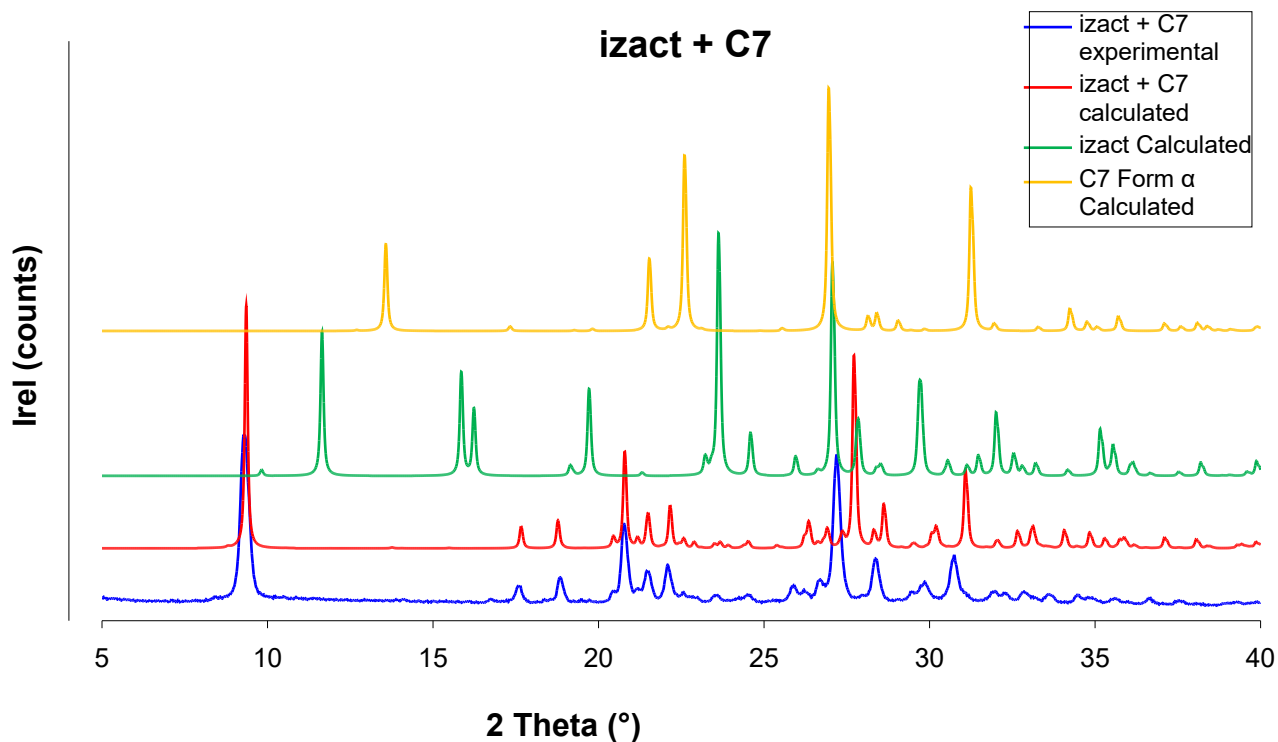

**Figure S2** Powder patterns for the experimental and calculated patterns of the cocrystal of izact + C7, together with the calculated patterns of its cofomers in their pure form.

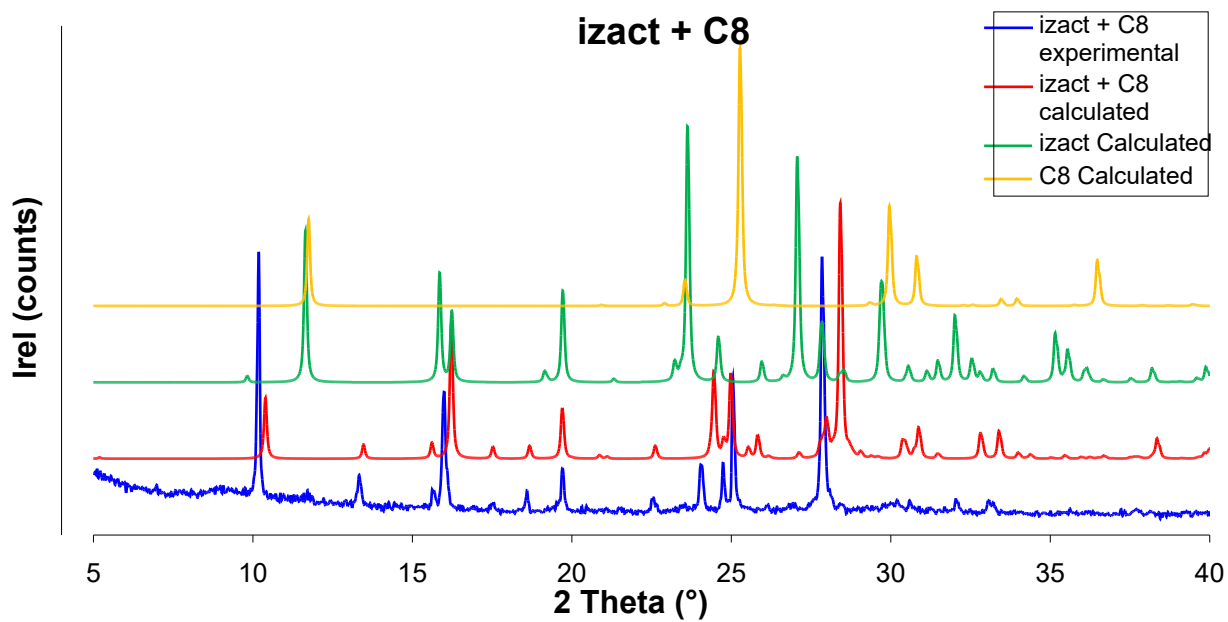

**Figure S3** Powder patterns for the experimental and calculated patterns of the cocrystal of izact + C8, together with the calculated patterns of its cofomers in their pure form.

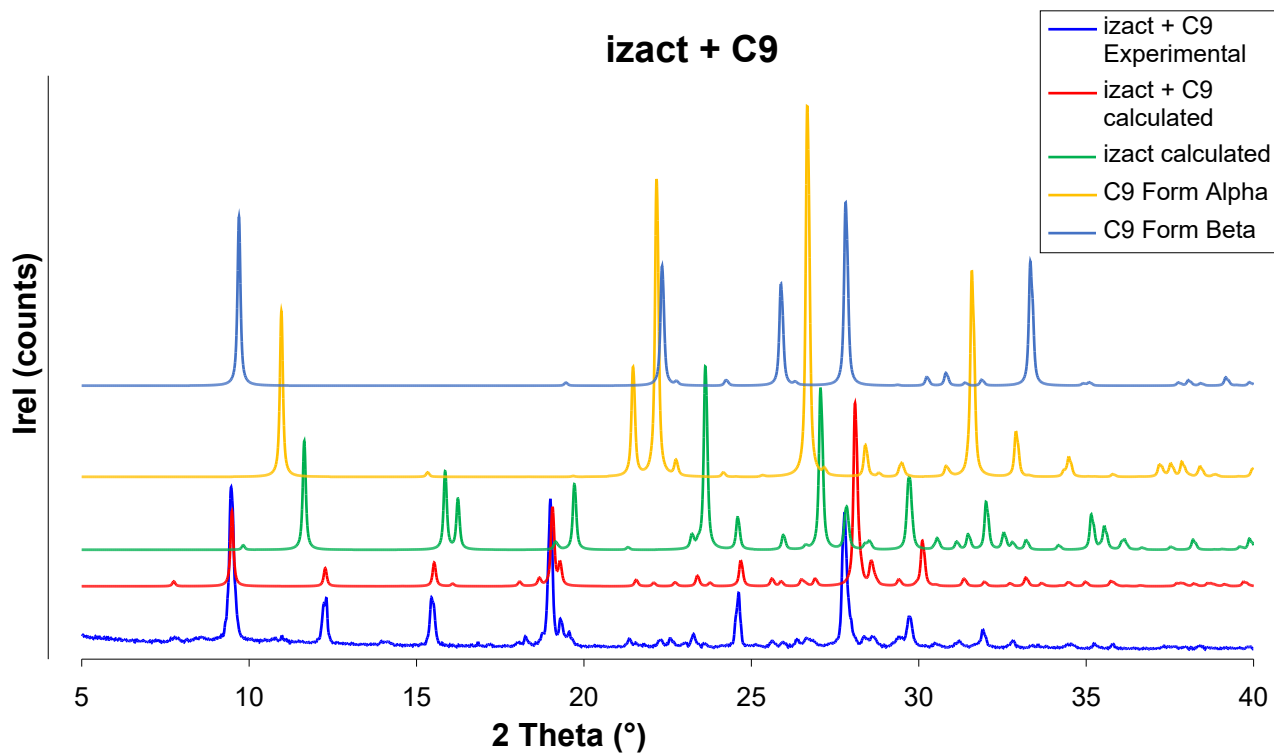

**Figure S4** Powder patterns for the experimental and calculated patterns of the cocrystal of izact + C9, together with the calculated patterns of its cofomers in their pure form.

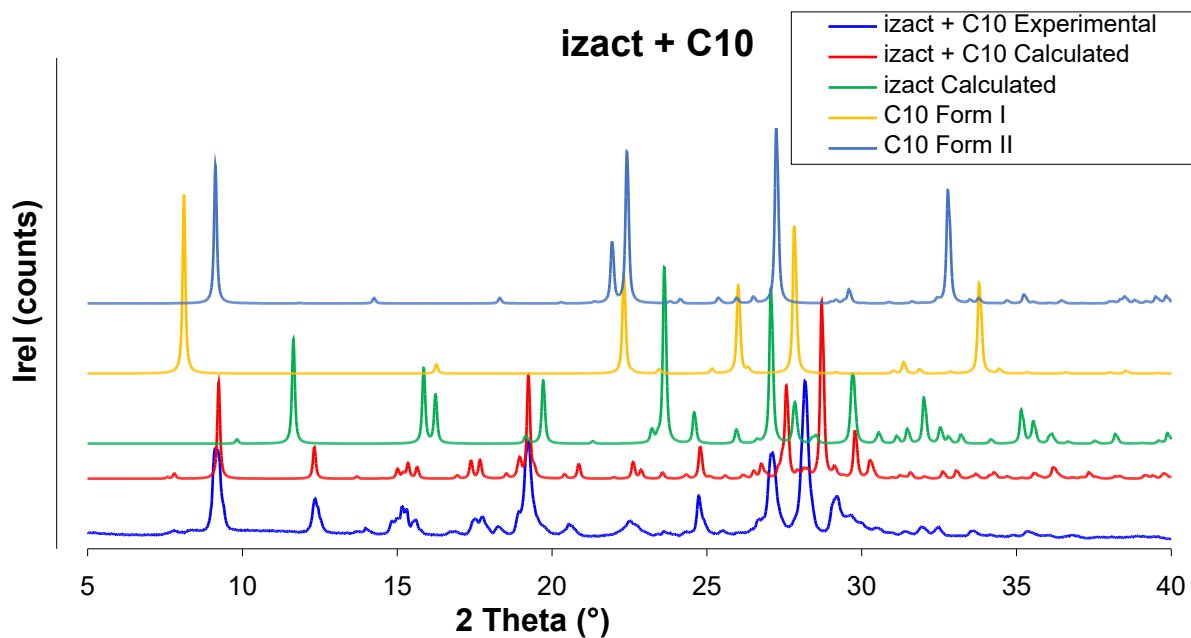

**Figure S5** Powder patterns for the experimental and calculated patterns of the cocrystal of izact + C7, together with the calculated patterns of its coformers in their pure form.

### S3 DSC Analysis

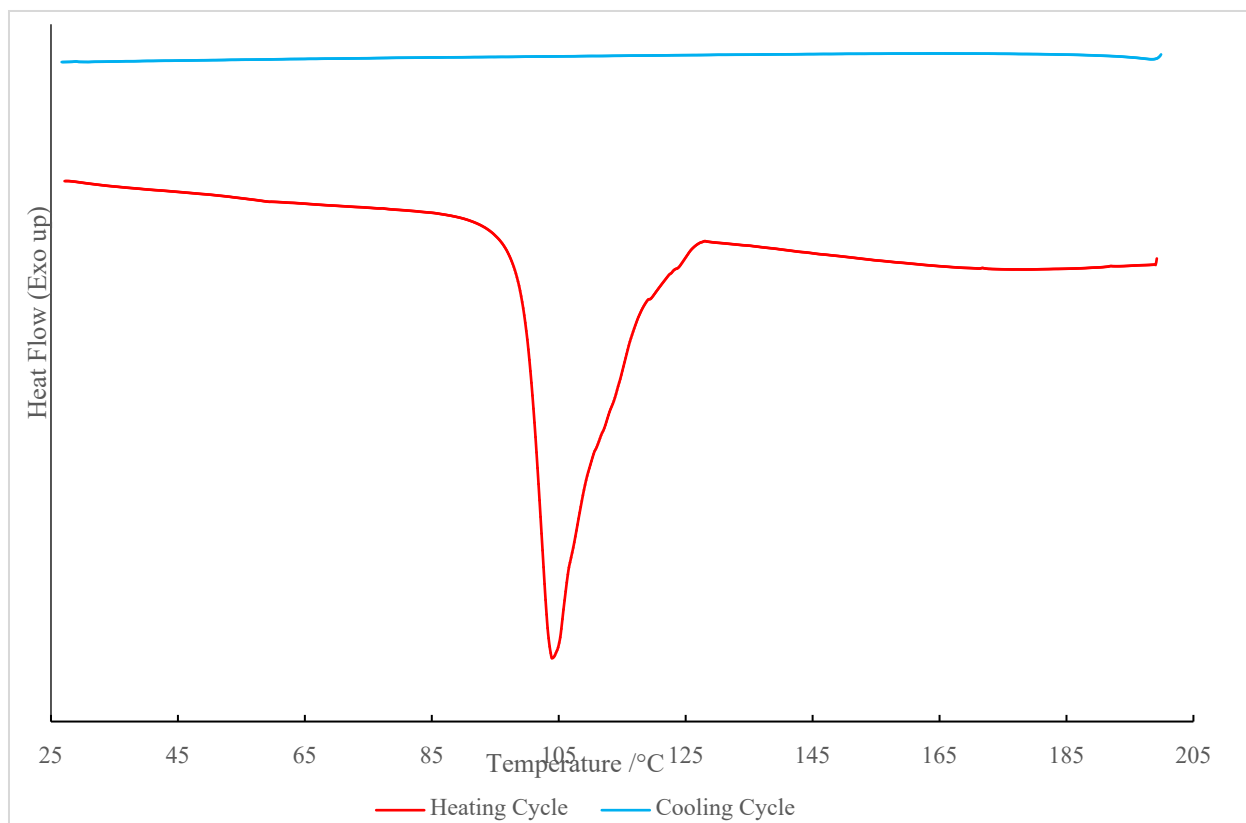

**Figure S6** DSC curve of **izact + C6**

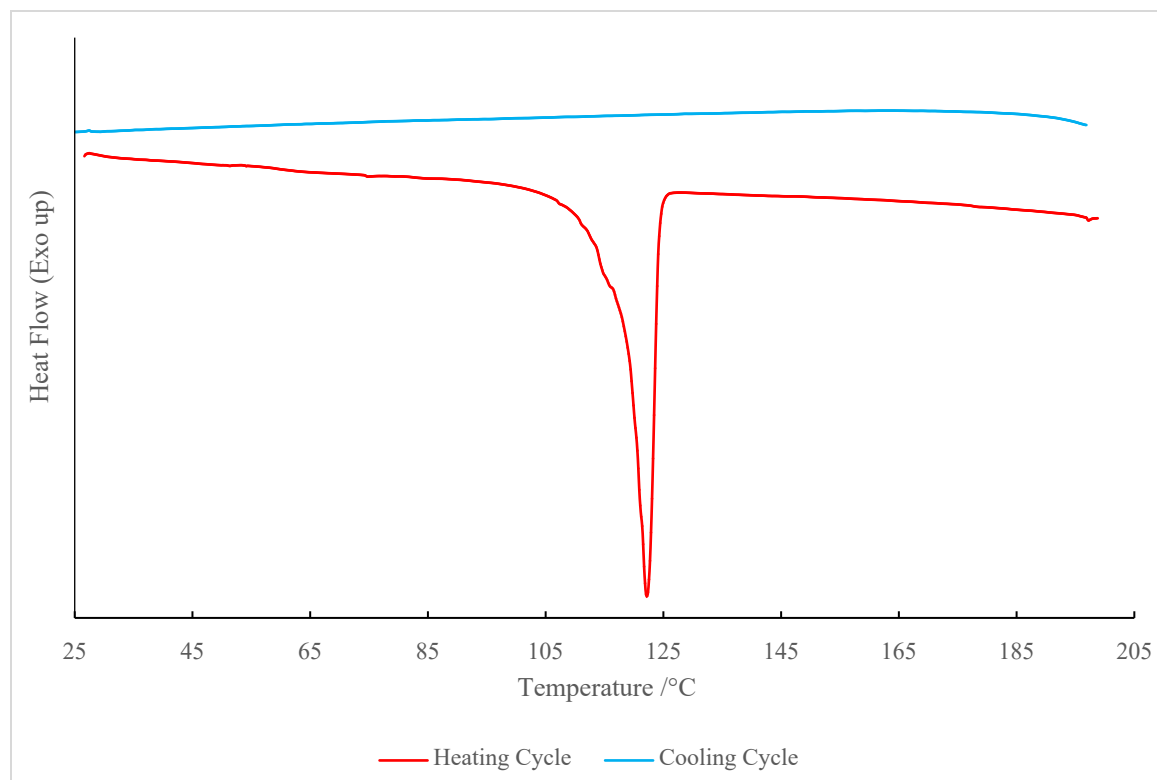

**Figure S7** DSC curve of **izact + C7**

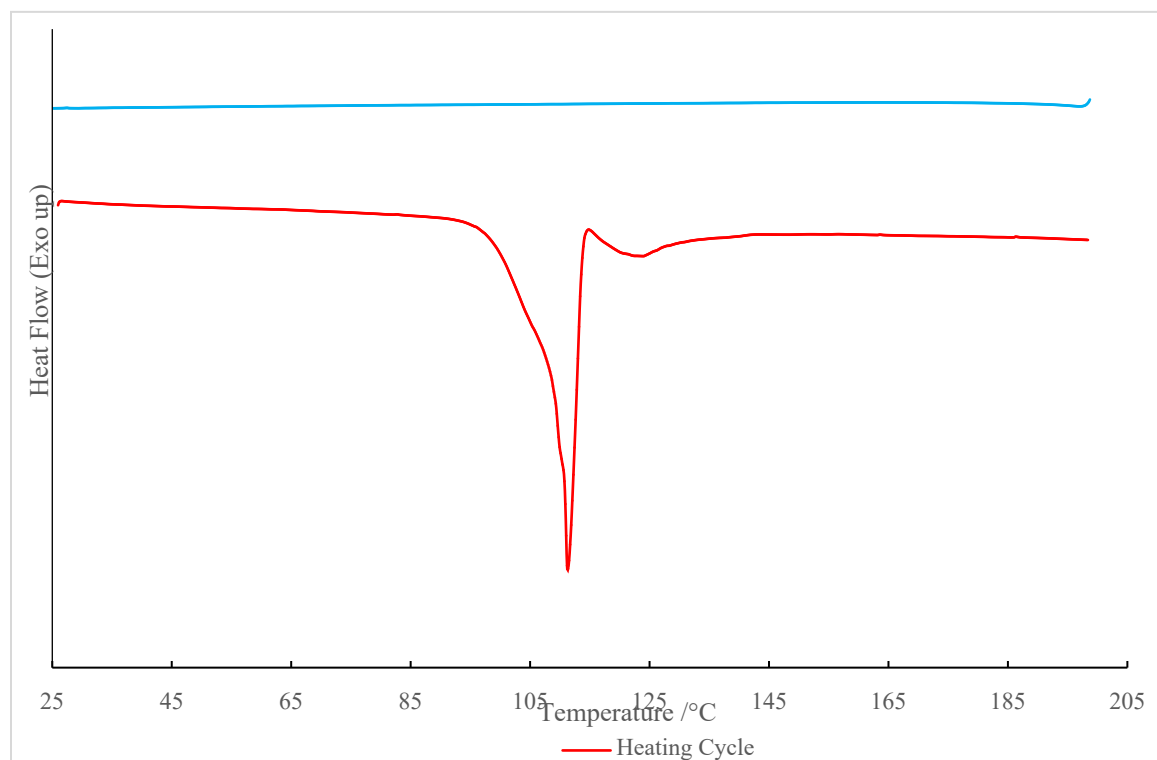

**Figure S8** DSC curve of **izact + C8**

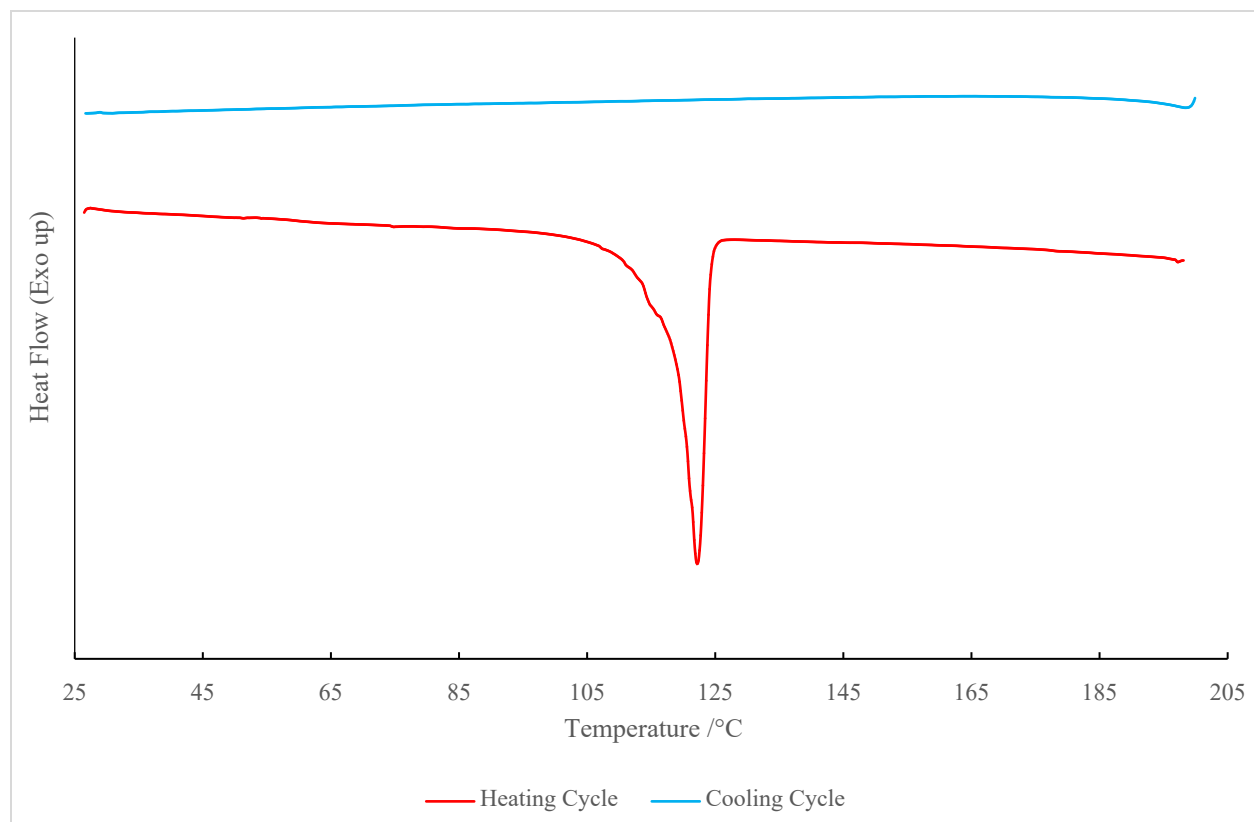

**Figure S9** DSC curve of **izact + C9**



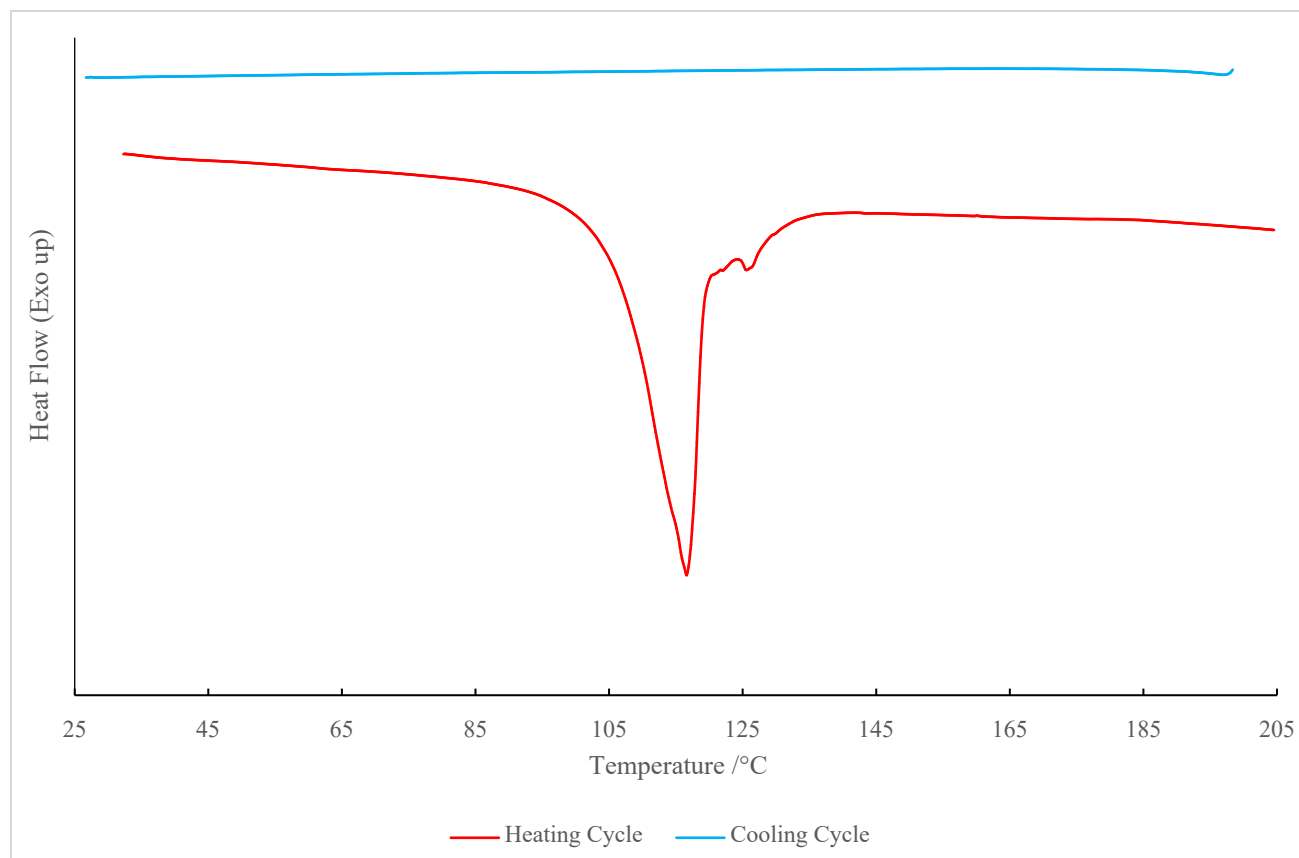

**Figure S10** DSC curve of **izact + C10**

## FTIR

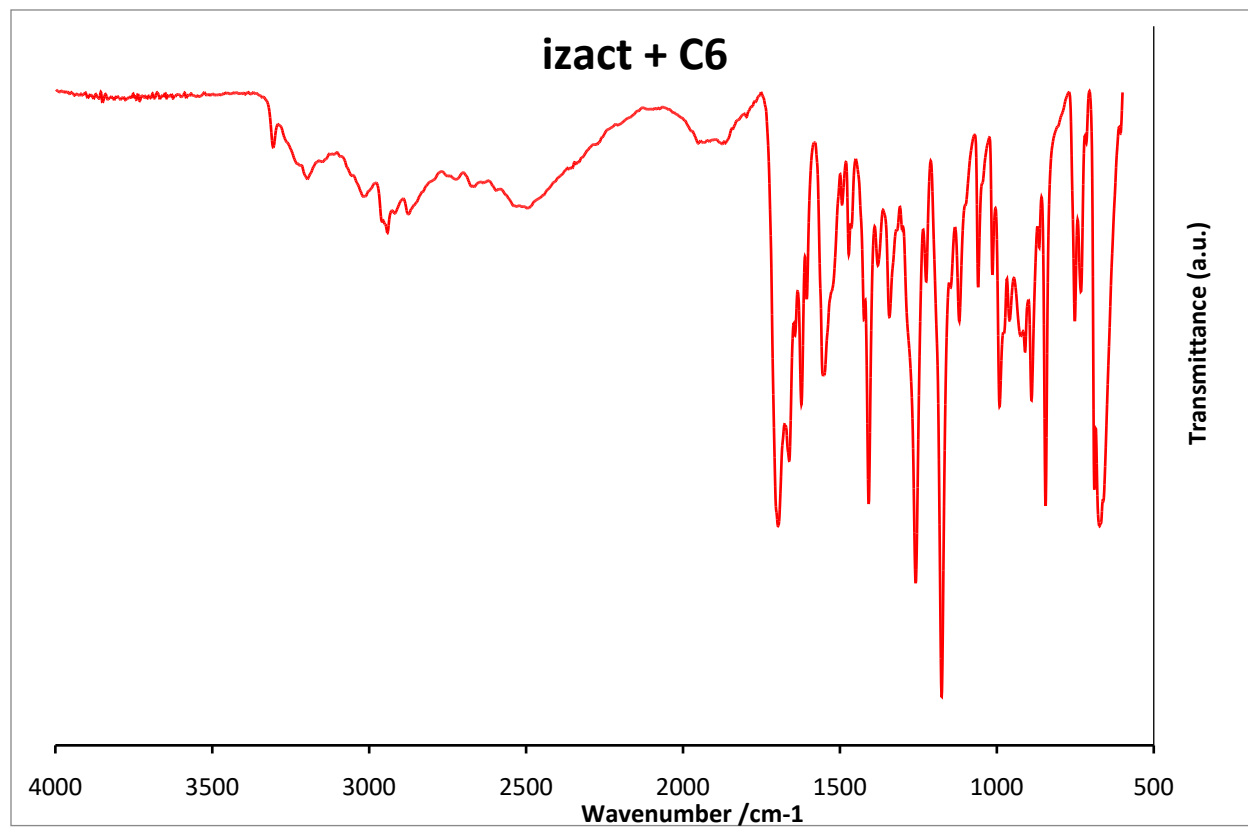

**Figure S11** FTIR Spectra of izact + C6.

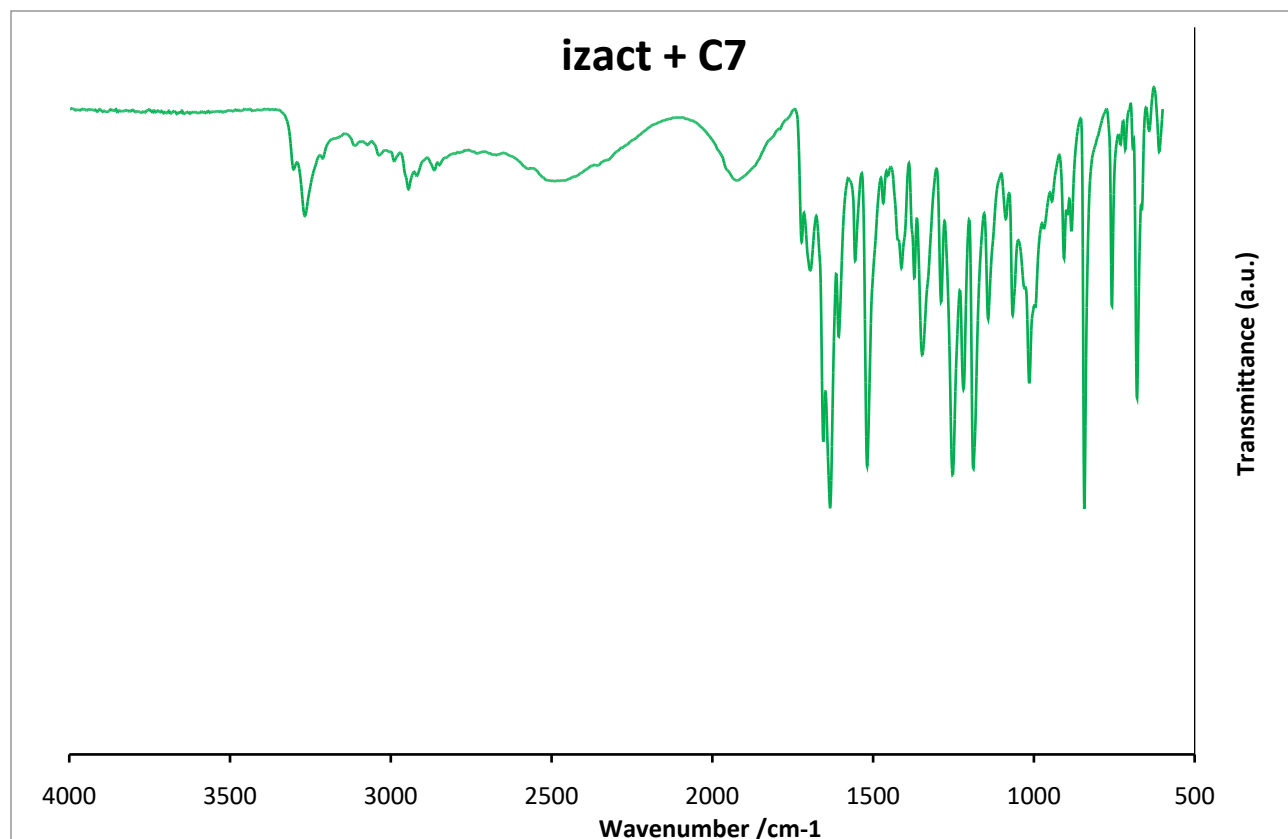

**Figure S12** FTIR Spectra of izact + C7.

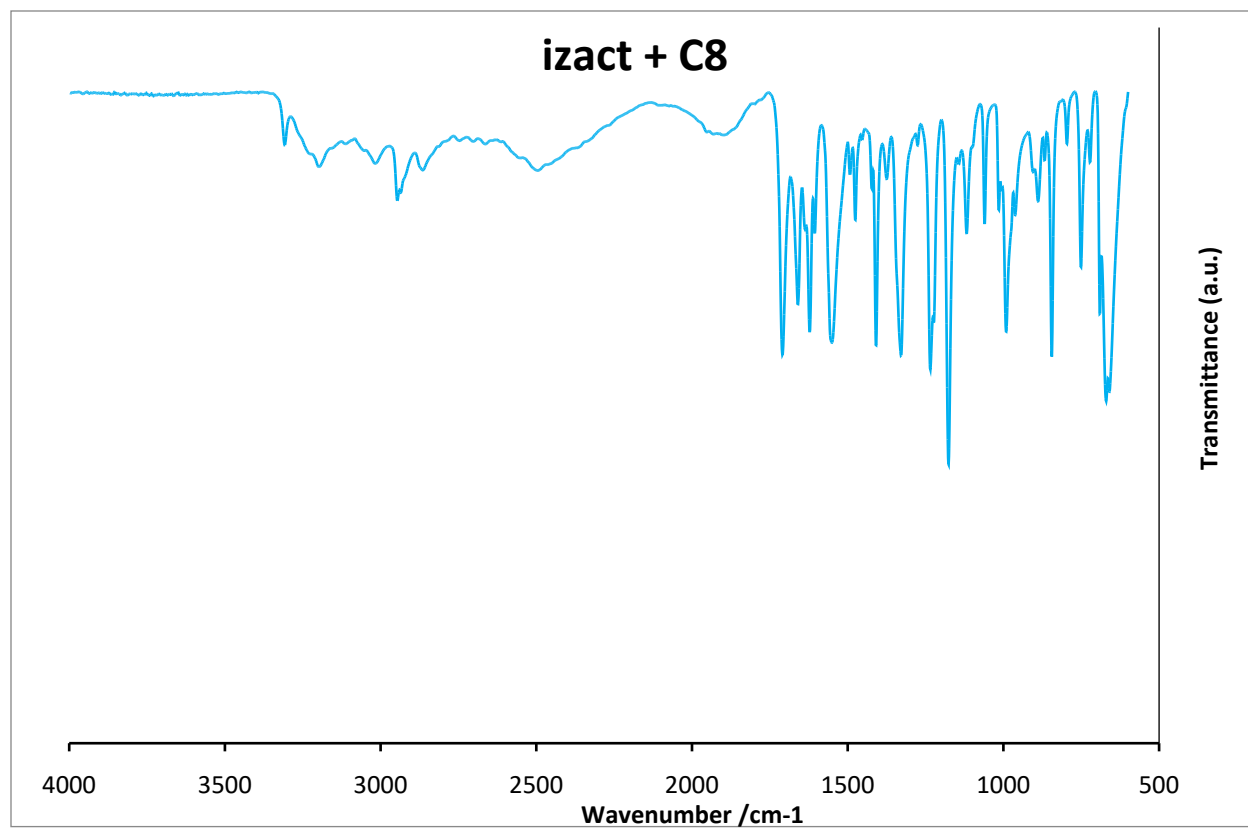

**Figure S13** FTIR Spectra of izact + C8.

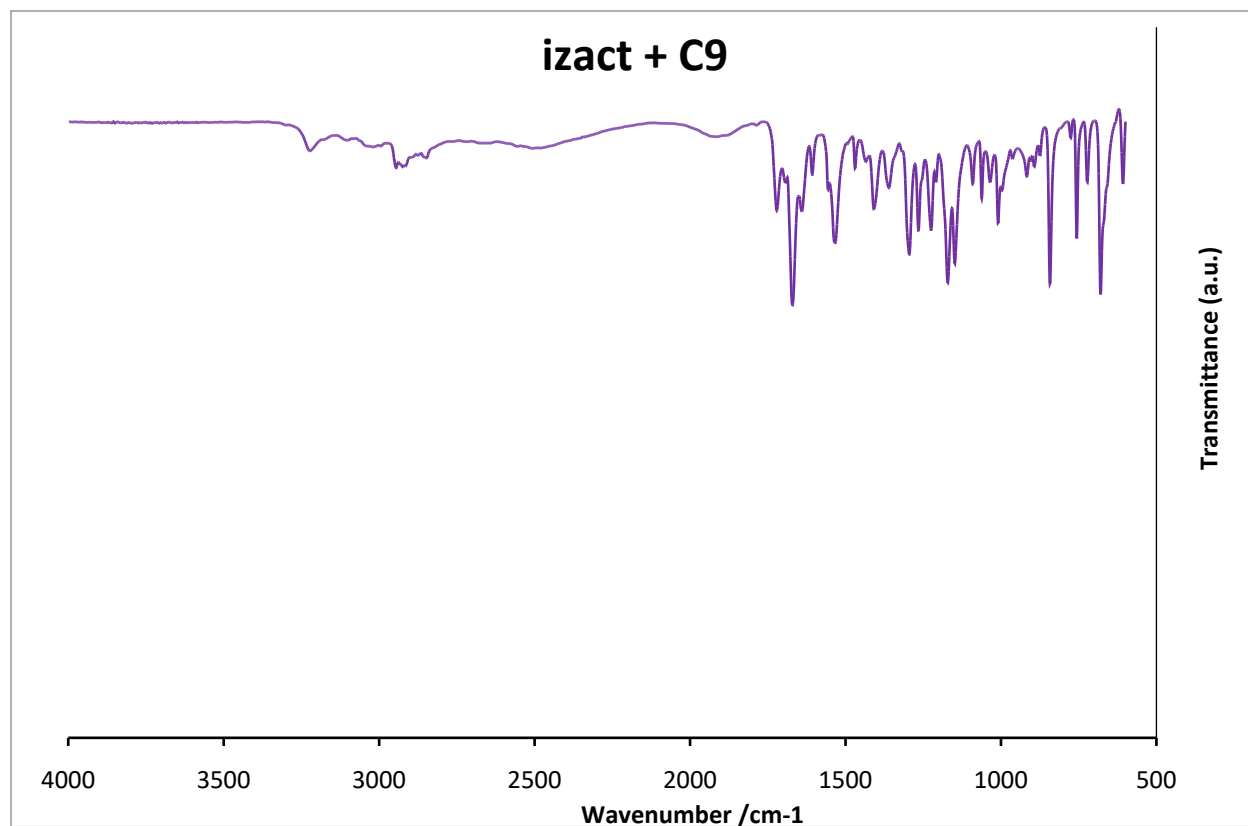

**Figure S14** FTIR Spectra of izact + C9.

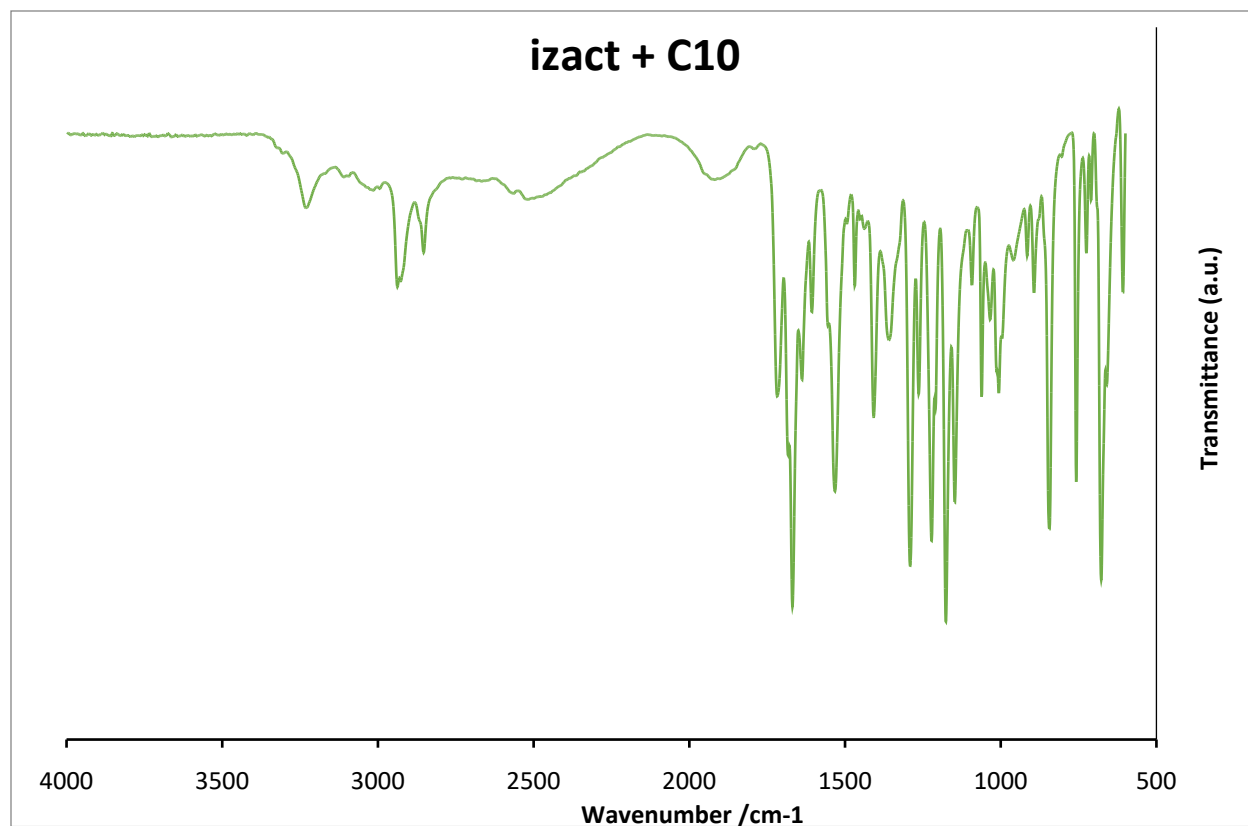

**Figure S15** FTIR Spectra of izact + C10.

**Table S7** Some FTIR assignments for the cocrystals of izact with dicarboxylic acids.

| Solid form  | $\nu$ (-C=O) | $\nu$ (-NH-) | $\nu$ (-OH) |
|-------------|--------------|--------------|-------------|
| izact + C6  | 1697.19      | 3196.66      | 2941.77     |
| izact + C7  | 1633.75      | 3267.29      | 2944.95     |
| izact + C8  | 1709.44      | 3307.85      | 2946.19     |
| izact + C9  | 1670.66      | 3222.19      | 2945.48     |
| izact + C10 | 1668.81      | 3231.23      | 2937.37     |
